# Supplementary material for: Interleukin-22 drives a metabolic adaptive reprogramming to maintain mitochondrial fitness and treat liver injury
Source: PubMed Central journal article supplement (PMC7254999; doi:10.7150/thno.43894), 2020-04-27
Supplement: thnov10p5879s1.pdf [file thnov10p5879s1.pdf]

**Interleukin-22 drives a metabolic adaptive reprogramming to maintain  
mitochondrial fitness and treat liver injury**

Wei Chen<sup>1,2,#</sup>, Wenjing Zai<sup>1,3,#</sup>, Jiajun Fan<sup>1</sup>, Xuyao Zhang<sup>1</sup>, Xian Zeng<sup>1</sup>, Jingyun Luan<sup>1</sup>, Yichen Wang<sup>1</sup>, Yilan Shen<sup>4</sup>, Ziyu Wang<sup>5</sup>, Shixuan Dai<sup>1</sup>, Si Fang<sup>1,6</sup>, Zhen Zhao<sup>1\*</sup>, Dianwen Ju<sup>1\*</sup>

<sup>1</sup>Minhang Hospital & Shanghai Engineering Research Center of Immunotherapeutics,  
School of Pharmacy, Fudan University, Shanghai, China

<sup>2</sup>Department of Ophthalmology, Stanford University School of Medicine, Palo Alto  
CA 94304, USA

<sup>3</sup>Key Laboratory of Medical Molecular Virology, School of Basic Medical Sciences,  
Shanghai Medical College of Fudan University

<sup>4</sup>Department of Nephrology, Changhai Hospital, Second Military Medical University,  
Shanghai, China

<sup>5</sup>Department of Pharmacy, Huadong Hospital, Fudan University, Shanghai, China

<sup>6</sup>Tongcheng Hospital of Traditional Chinese Medicine, Anhui 231400, P. R. China

<sup>#</sup>These authors contributed equally to this work.

\*Correspondence to:

Prof. Zhen Zhao, Email: [fdmh\\_zz@fudan.edu.cn](mailto:fdmh_zz@fudan.edu.cn)

Prof. Dianwen Ju, E-mail: [dianwenju@fudan.edu.cn](mailto:dianwenju@fudan.edu.cn)

Minhang Hospital & Shanghai Engineering Research Center of Immunotherapeutics,  
School of Pharmacy, Fudan University, Shanghai, China

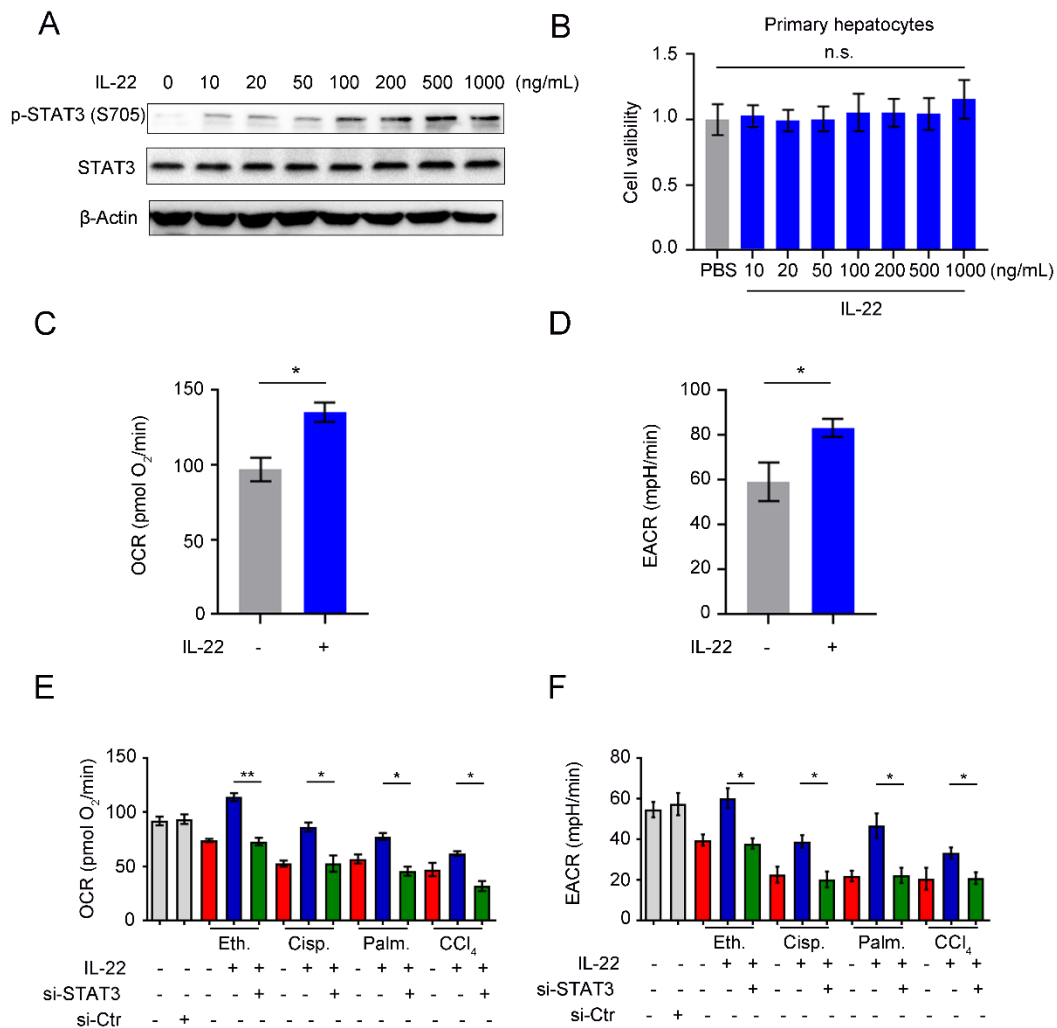

**Figure S1.** (A) Dose-response experiments of IL-22 on hepatocytes. Hepatocytes were stimulated difference doses of IL-22. STAT3 signaling activation in hepatocytes was assessed by western blot analysis. (B) *In vitro* cytotoxicity of IL-22 on hepatocytes ( $n = 4$ ; mean  $\pm$  SD; n.s., not significant). (C and D) OCR and ECAR in hepatocytes treated with IL-22 for 24 h ( $n = 3$ ). (E and F) Basal OCR and ECAR in hepatocytes at the absence or presence of IL-22, or si-STAT3 for 24 h ( $n = 3$ ). All data are means  $\pm$  SD of at least three independent experiments.

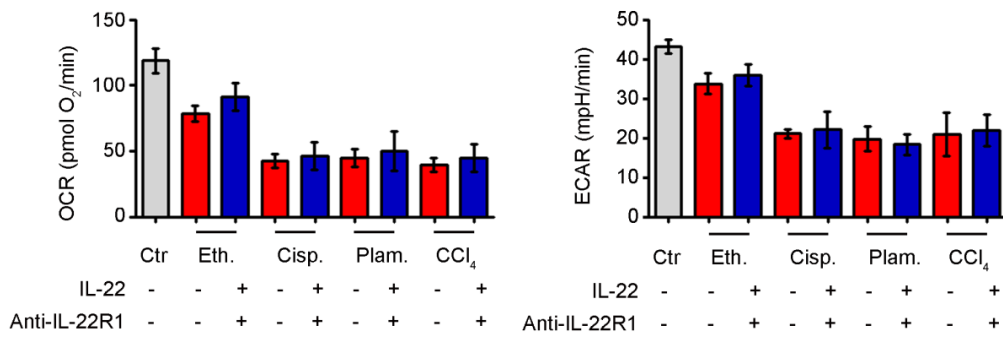

**Figure S2.** OCR and ECAR in hepatocytes treated with 200 mM ethanol, or 5  $\mu$ g/mL cisplatin, or 0.25 mM palmitic acid, or 10 mM CCl<sub>4</sub> in the absence or presence of IL-22 and anti-IL-22R1 antibody for 24 h ( $n = 3$ ; mean  $\pm$  SD). All data are means  $\pm$  SD of at least three independent experiments.

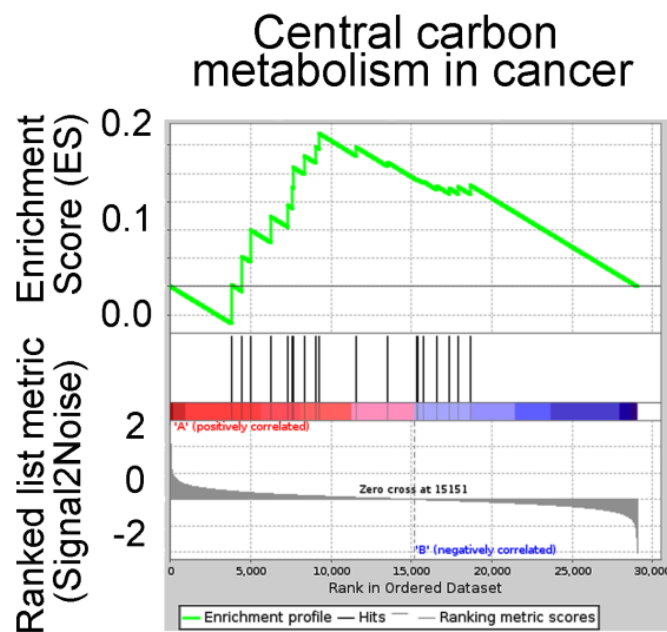

**Figure S3.** KEGG of central carbon metabolism in cancer in IL-22-protected and -nonprotected hepatocytes.

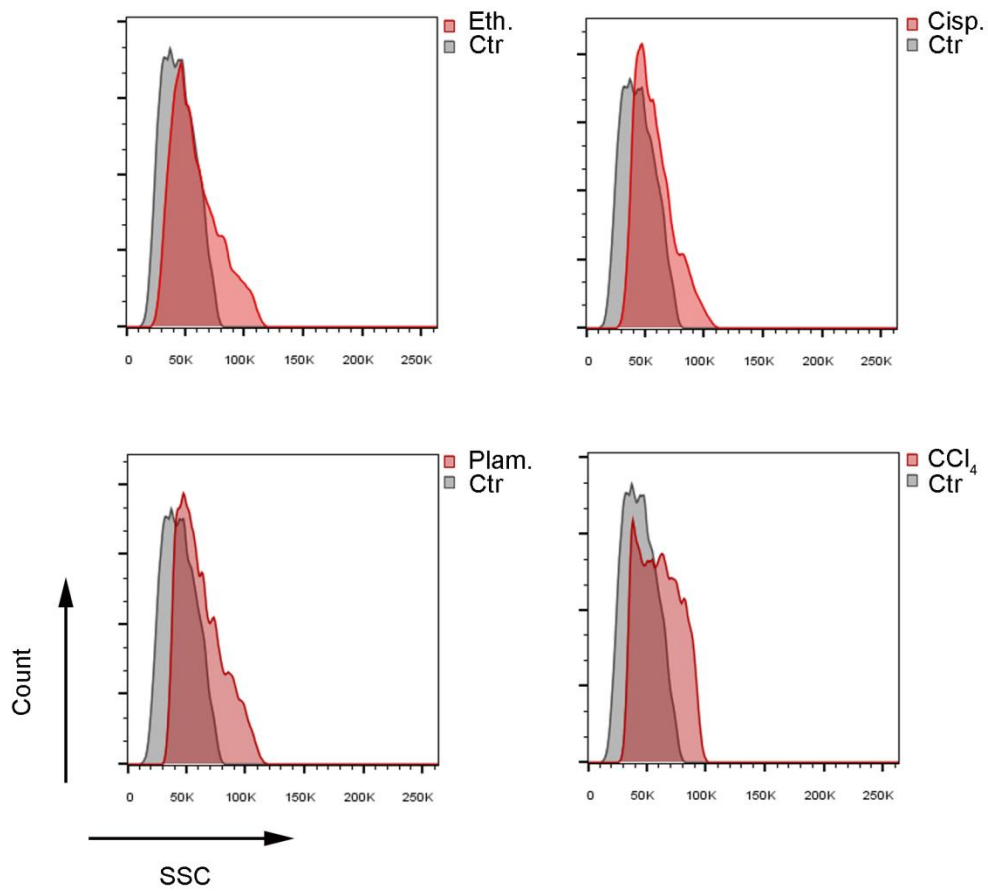

**Figure S4.** Hepatocytes lead to greater intracellular complexity (reflected by SSC) under injury stress.

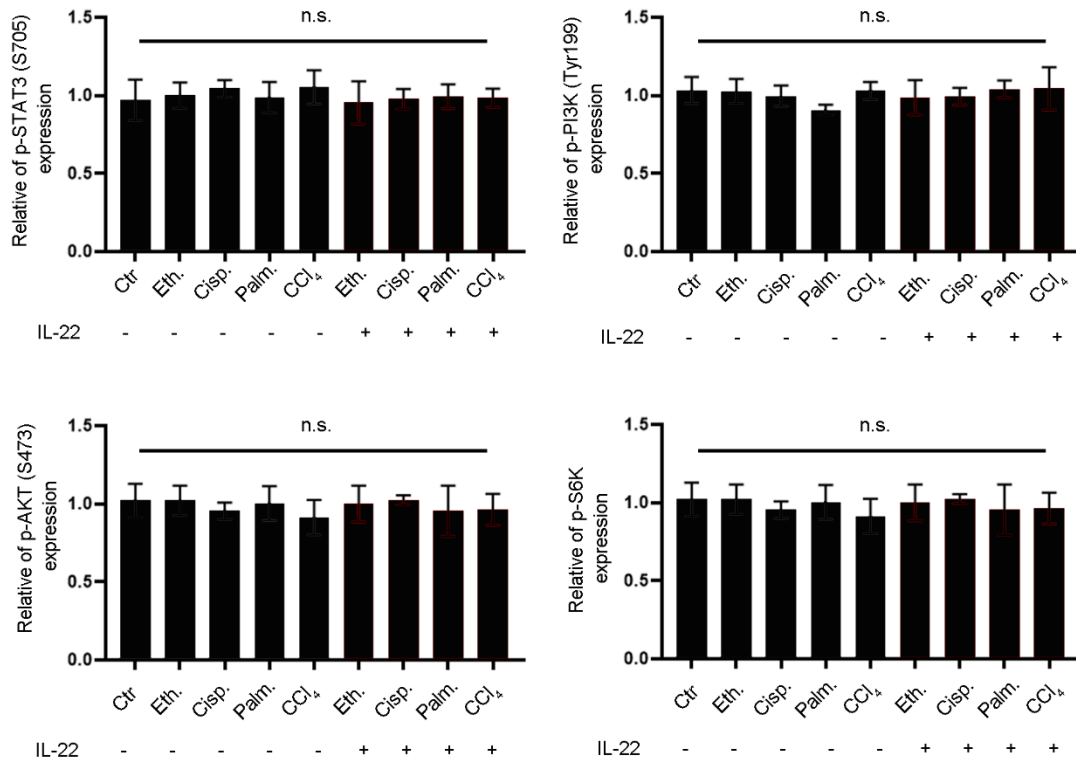

**Figure S5.** Densitometric values were quantified and normalized to control group ( $n = 3$ ; mean  $\pm$  SD;  $**P < 0.01$ ,  $***P < 0.001$ ). The values of control group were set to 1.

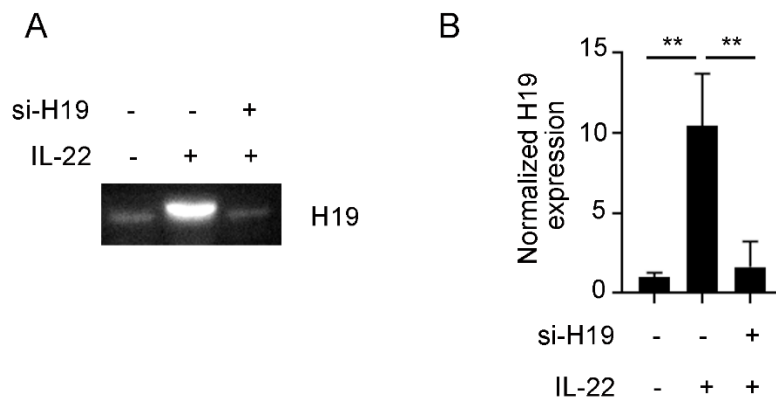

**Figure S6.** (A) Gel electrophoresis analysis of standard RT-PCR of lncRNA H19 and from IL-22-treated hepatocytes. (B) Real time PCR analysis suggesting that IL-22 induced lncRNA H19 overexpression in hepatocytes, which could be prevented by

siRNA-lncRNA H19 (si-H19) ( $n = 3$ , mean  $\pm$  SD;  $**P < 0.01$ ). All data are means  $\pm$  SD of at least three independent experiments.

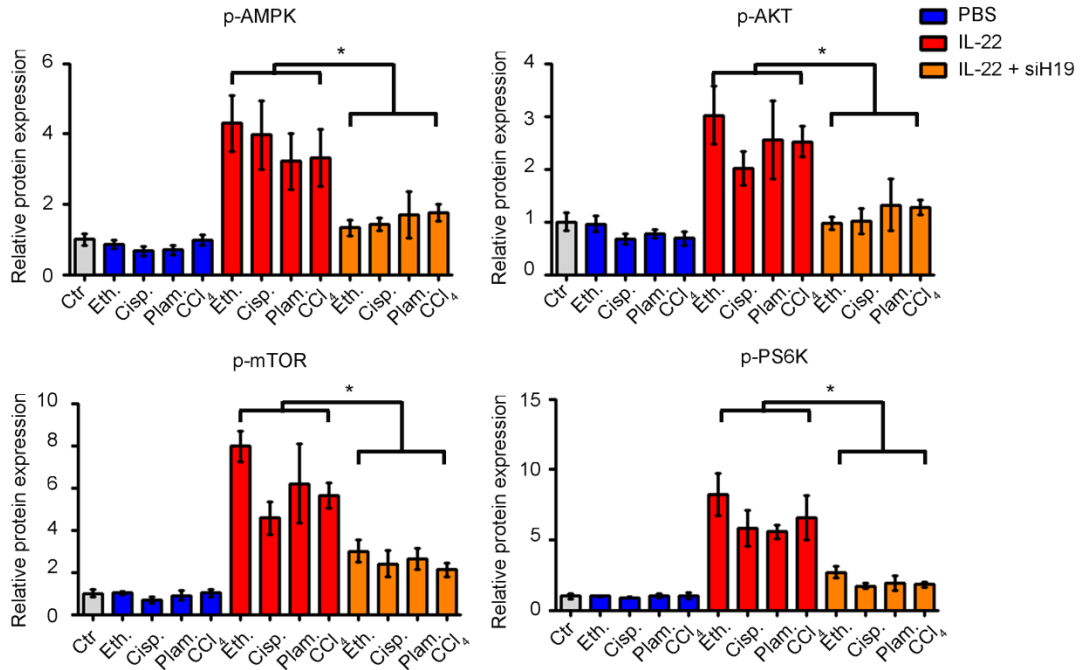

**Figure S7.** Densitometric values were quantified and normalized to control group ( $n = 3$ ; mean  $\pm$  SD;  $*P < 0.05$ ). The values of control group were set to 1.

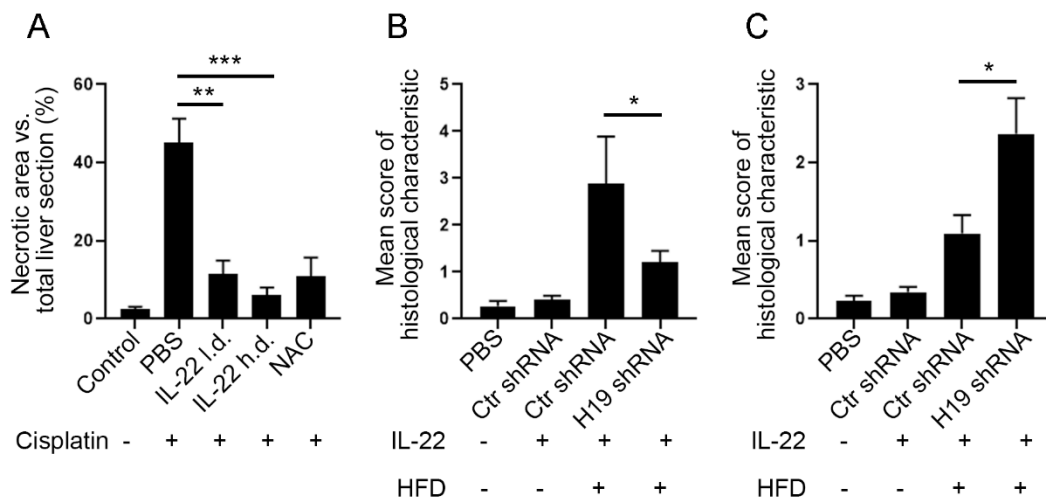

**Figure S8.** (A) Statistical analysis of necrotic area in H-E stained liver section. ( $n = 3$ ; mean  $\pm$  SD;  $**P < 0.01$ ). (B and C) High-fat-diet (HFD)-induced steatohepatitis

activity score.

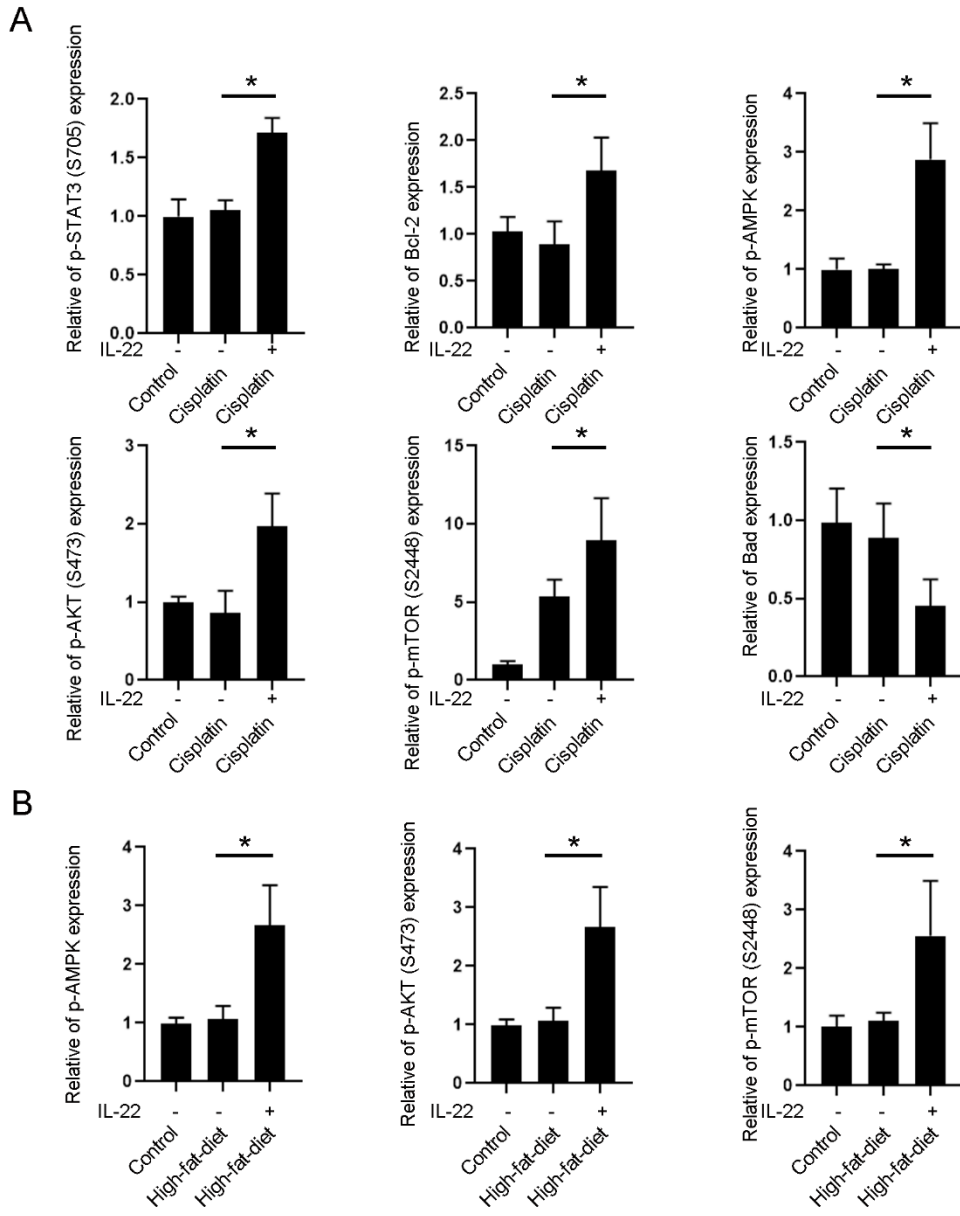

**Figure S9.** Densitometric values were quantified and normalized to control group ( $n = 4$ ; mean  $\pm$  SD; \*\* $P < 0.01$ , \*\*\* $P < 0.001$ ). The values of control group were set to

1.

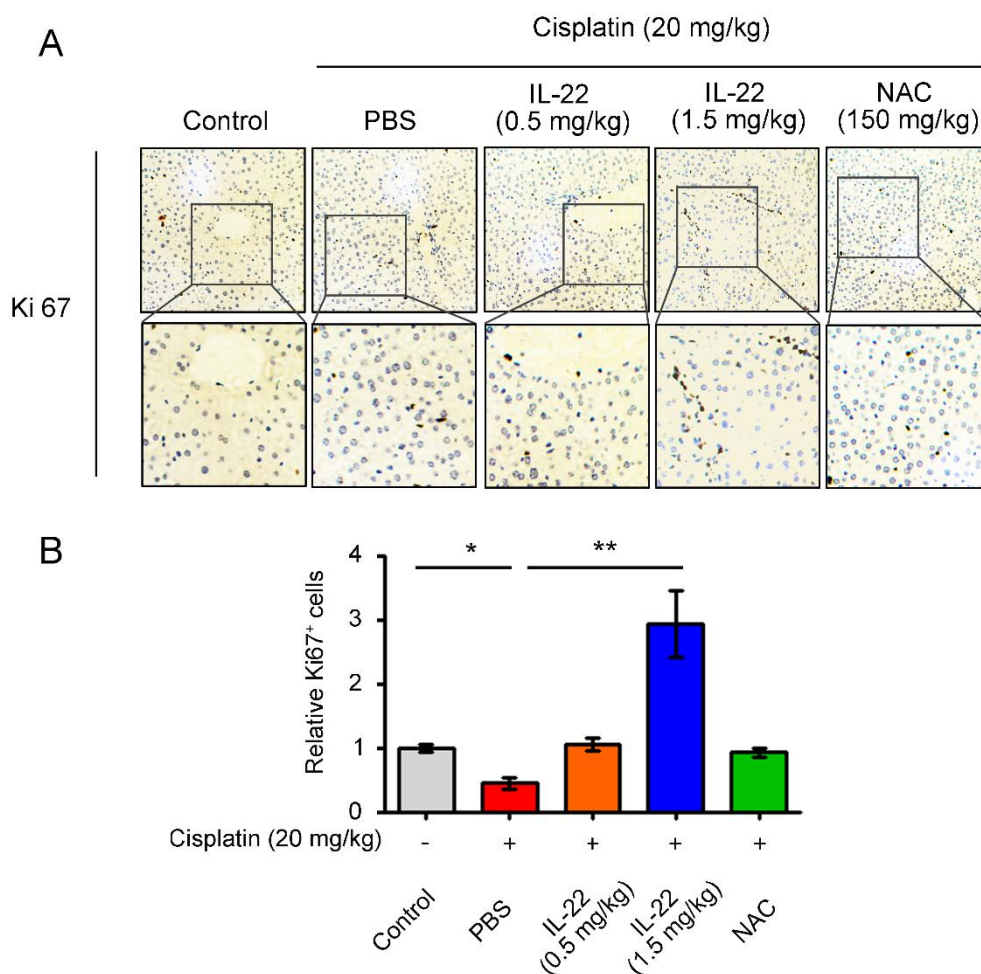

**Figure S10.** (A) Representative Ki-67 staining images of the liver sections were presented. (B) Statistical analysis for the percentage of Ki-67 positive cells ( $n = 3$ ; mean  $\pm$  SD; \* $P < 0.05$ , \*\* $P < 0.01$ ). The values of control group were set to 1.

**Supplementary Table 1. List of PCR Primers**

| Primer Name   | Sequence (5'-3')     |
|---------------|----------------------|
| GAPDH F1      | AACTTTGGCATTGTGGAAGG |
| GAPDH R1      | ACACATTGGGGGTAGGAACA |
| <i>H19</i> F1 | GACTAGGCCAGGTCTCCAGC |



|                  |                         |
|------------------|-------------------------|
| <i>H19</i> R1    | TGACCACACCTGTCATCCTC    |
| IL-6 F1          | TTCCATCCAGTTGCCTTCTTGG  |
| IL-6 R1          | TTCTCATTTCCACGATTTCCCAG |
| HK2 F1           | GGCGGTTCCGGAAGGAGATG    |
| HK2 R1           | GCCAGGCATTCGGCAATGTG    |
| TNF- $\alpha$ F1 | AGAACTCCAGGCGGTGCCTA    |
| TNF- $\alpha$ R1 | AGTGTGAGGGTCTGGGCCAT    |
| H19 shRNA        | GCATGACAGACAGAACATT     |
